# Supplementary material for: Inference of SARS-CoV-2 generation times using UK household data
Source: bioRxiv or medRxiv preprint supplement (doi:10.1101/2021.05.27.21257936), 2021-05-30
Supplement: Supplementary file [file media-1.pdf]

1 **Supplementary Text:**

2 Details of mechanistic model

3 Each infected host (who developed symptoms) was assumed to progress through latent ( $E$ ),  
4 presymptomatic infectious ( $P$ ) and symptomatic infectious ( $I$ ) stages. We denote the  
5 infectiousness of hosts in the  $P$  and  $I$  stages by  $\beta_P$  and  $\beta_I$ , respectively, and define the ratio  
6  $\alpha_P = \beta_P/\beta_I$ . The duration of each stage, denoted  $y_{E/P/I}$ , was assumed to be gamma  
7 distributed:

8 
$$y_E \sim \text{Gamma}(k_E, 1/(k_{inc}\gamma)),$$

9 
$$y_P \sim \text{Gamma}(k_P, 1/(k_{inc}\gamma)),$$

10 
$$y_I \sim \text{Gamma}(k_I, 1/(k_I\mu)),$$

11 where we write  $X \sim \text{Gamma}(a, b)$  for a gamma distributed random variable with shape  
12 parameter  $a$  and scale parameter  $b$ . We assumed that  $k_E + k_P = k_{inc}$ , so that the incubation  
13 period,  $\tau_{inc} = y_E + y_P$ , was gamma distributed, with

14 
$$\tau_{inc} \sim \text{Gamma}(k_{inc}, 1/(k_{inc}\gamma)).$$

15 Here, the parameters  $k_{inc}$  and  $1/\gamma$  (which represent the shape parameter of the incubation  
16 period distribution and the reciprocal of the mean incubation period, respectively) were fixed  
17 in order to obtain the specified incubation period distribution (the exact values that we  
18 assumed are given in Table S1).

19

20 For simplicity, we assumed that  $k_I = 1$ , so the symptomatic infectious period was  
21 exponentially distributed. The parameters  $k_E$  (the shape parameter of the latent ( $E$ ) period  
22 distribution),  $1/\mu$  (the mean symptomatic infectious ( $I$ ) period) and  $\alpha_P$  (the ratio between the  
23 transmission rates of hosts in the  $P$  and  $I$  stages) were estimated when we fitted the model to  
24 the household transmission data.

25

26 Hosts who remained asymptomatic throughout infection were assumed to follow the same  
 27 *E/P/I* stages, although in this case the distinction between the *P* and *I* stages has no  
 28 epidemiological meaning. Stage durations, as well as the value of  $\alpha_P$ , were assumed to be  
 29 identical for entirely asymptomatic hosts and those who developed symptoms, so that the  
 30 generation time distribution was the same for all hosts.

31

### 32 *Conditional infectiousness*

33 For a host who develops symptoms, conditional on incubation period  $\tau_{inc}$ , the expected  
 34 infectiousness at time since infection  $\tau$  is [1]

$$35 \quad \beta(\tau | \tau_{inc}) = \begin{cases} \alpha_P C(\beta_0/n)(1 - F_{Beta}(1 - \tau/\tau_{inc}; k_P, k_E)), & 0 < \tau < \tau_{inc}, \\ C(\beta_0/n)(1 - F_I(\tau - \tau_{inc})), & \tau > \tau_{inc}. \end{cases}$$

36 Here,  $\beta_0$  is the overall infectiousness parameter (see Methods in the main text),  $n$  is the  
 37 household size,  $F_I(y)$  is the cumulative distribution of the duration of the *I* stage,  
 38  $F_{Beta}(x; a, b)$  is the cumulative distribution of a beta distributed random variable with shape  
 39 parameters  $a$  and  $b$ , and

$$40 \quad C = \frac{k_{inc}\gamma\mu}{\alpha_P k_P \mu + k_{inc}\gamma}.$$

41

42 The cumulative conditional infectiousness can therefore be calculated to be

$$43 \quad B(\tau | \tau_{inc}) = \int_0^\tau \beta(\tilde{\tau} | \tau_{inc}) d\tilde{\tau}$$

$$44 \quad = \begin{cases} (\tau - \tau_{inc})\beta(\tau | \tau_{inc}) + \frac{\alpha_P C \beta_0}{n} \left[ \frac{k_P \tau_{inc}}{k_{inc}} (1 - F_{Beta}(1 - \tau/\tau_{inc}; k_P + 1, k_E)) \right], & 0 \leq \tau < \tau_{inc}, \\ (\tau - \tau_{inc})\beta(\tau | \tau_{inc}) + \frac{C \beta_0}{n} \left[ \frac{\alpha k_P \tau_{inc}}{k_{inc}} + \frac{1}{\mu} F_{Gamma}(\tau - \tau_{inc}; k_I + 1, \frac{1}{k_I \mu}) \right], & \tau \geq \tau_{inc}, \end{cases}$$

45 where  $F_{Gamma}(x; a, b)$  is the cumulative distribution of a gamma distributed random variable  
 46 with shape parameter  $a$  and scale parameter  $b$ . The total force of infection on each household  
 47 member (over the course of infection) is then

48 
$$B(\infty | \tau_{inc}) = \frac{\beta_0}{n} \left( \frac{\alpha k_P \gamma \mu \tau_{inc} + k_{inc} \gamma}{\alpha k_P \mu + k_{inc} \gamma} \right).$$

49 The mean of this expression over the incubation period distribution is then  $\beta_0/n$ .

50

51 For hosts who remained asymptomatic throughout infection, conditional on the combined  
 52 duration of the  $E$  and  $P$  stages,  $\tau_{inc} = y_E + y_P$ , the infectiousness,  $\beta(\tau | \tau_{inc})$ , was given by  
 53  $\alpha_A$  times the corresponding expression for those who developed symptoms. We note that in  
 54 this case,  $\tau_{inc}$  has no epidemiological interpretation, but this conditional infectiousness was  
 55 useful when fitting parameters (see ‘‘Parameter fitting’’ below).

56

57 *Generation time distribution*

58 The generation time,  $\tau_{gen}$ , can be written as

59 
$$\tau_{gen} = y_E + y^*,$$

60 where  $y_E$  is the length of the latent ( $E$ ) stage, and  $y^*$  is the time from the start of the  
 61 presymptomatic infectious ( $P$ ) stage to the transmission occurring. As shown in [1],  $y^*$  has  
 62 density

63 
$$f^*(y^*) = C \left( \alpha_P (1 - F_P(y^*)) + \int_0^{y^*} (1 - F_I(y^* - y_P)) f_P(y_P) dy_P \right).$$

64 Using this density, it can be shown that the moments of this distribution are

65 
$$E[(y^*)^m] = \frac{C}{m+1} (\alpha_P E[y_P^{m+1}] + E[(y_P + y_I)^{m+1} - y_P^{m+1}]).$$

66 In particular, we have

67 
$$E[y^*] = \frac{C}{2} (\alpha_P E[y_P^2] + 2E[y_P]E[y_I] + E[y_I^2]),$$

68 
$$\text{Var}[y^*] = \frac{C}{3} (\alpha_P E[y_P^3] + 3E[y_P^2]E[y_I] + 3E[y_P]E[y_I^2] + E[y_I^2]) - (E[y^*])^2.$$

69 Note that for a gamma distributed random variable,  $X \sim \text{Gamma}(a, b)$ , we have

70 
$$E[X^m] = \frac{\Gamma(a+m)}{\Gamma(a)} b^m = a(a+1) \dots (a+(m-1))b^m.$$

71 Therefore, for gamma distributed stage durations, explicit expressions can be obtained for the  
72 mean and variance of the generation time distribution,

73 
$$E[\tau_{gen}] = E[y_E] + E[y^*],$$

74 
$$\text{Var}[\tau_{gen}] = \text{Var}[y_E] + \text{Var}[y^*],$$

75 since  $y_E$  and  $y^*$  are assumed to be independent.

76

77 *Proportion of presymptomatic transmissions*

78 Among infectors who develop symptoms, the proportion of transmissions occurring prior to  
79 symptom onset is given by [1]

80 
$$q_P = \frac{\left(\frac{\beta_P k_P}{k_{inc} \gamma}\right)}{\left(\frac{\beta_P k_P}{k_{inc} \gamma} + \frac{\beta_I}{\mu}\right)} = \frac{\alpha_P k_P \mu}{\alpha_P k_P \mu + k_{inc} \gamma}.$$

81

82 *Parameter fitting*

83 The vector of model parameters,

84 
$$\theta = (k_E/k_{inc}, 1/\mu, \alpha_P, \beta_0),$$

85 was estimated by fitting the mechanistic model to the household transmission data.

86

87 We assumed independent prior distributions for each entry of  $\theta$ . Lognormal priors were  
88 assumed for  $1/\mu$ ,  $\alpha_P$  and  $\beta_0$ . Since  $\alpha_P$  represents the ratio between the transmission rate of  
89 hosts in the  $P$  and  $I$  stages, a prior with median 0 was used to ensure equal prior probabilities  
90 of values above and below 1. This prior was also chosen to limit the prior probability of  
91 extreme values, with a prior 95% credible interval of [0.2,5]. A beta prior was used for  
92  $k_E/k_{inc}$  (which was constrained to lie between 0 and 1), and was chosen to restrict the prior

93 probability of values very close to either 0 or 1. The exact priors we used are given in Table  
94 S3.

95

96 A slightly amended version of the parameter fitting algorithm described in the main text for  
97 the independent transmission and symptoms model was used. In particular, we augmented the  
98 observed data with:

99 i. The infection time,  $t_j$ , of each infected host.

100 ii. The time,  $t_{s,j}$ , at which each infected host transitioned from the  $P$  to  $I$  stage.

101 Note that for hosts who developed symptoms, the time of entry into the  $I$  stage corresponds to  
102 the symptom onset time. The data were also augmented with this transition time for entirely  
103 asymptomatic infected hosts because the conditional infectiousness,  $\beta(\tau | t_{s,j} - t_j)$ , was  
104 relatively easy to calculate compared to  $\beta(\tau)$ .

105

106 In each step of the chain, we carried out (in turn) one of the following:

107 1. Propose new values for the vector of model parameters,  $\theta$ , using a multivariate  
108 normal proposal distribution (around the value of  $\theta$  in the previous step of the  
109 chain; a correlation of 0.5 was used between the proposal distributions of  
110  $k_E/k_{inc}$  and  $\alpha_P$ , and between those of  $1/\mu$  and  $\alpha_P$ ). Accept the proposed  
111 parameters,  $\theta_{prop}$ , with probability

112 
$$\min\left(\frac{L(\theta_{prop}; \mathbf{t})\pi(\theta_{prop})}{L(\theta_{old}; \mathbf{t})\pi(\theta_{old})}, 1\right),$$

113 where  $\theta_{old}$  denotes the vector of parameter values from the previous step of  
114 the chain, and where the augmented data,  $\mathbf{t}$ , remain unchanged in this step.

115 2. Propose new values for the precise symptom onset times of each symptomatic  
116 infected host, using independent uniform proposal distributions (within the

117 day of symptom of onset for each host). For each household,  $m$ , accept the  
 118 proposed augmented data,  $\mathbf{t}_{prop}^{(m)}$ , from that household with probability

$$119 \quad \min \left( \frac{L^{(m)}(\theta; \mathbf{t}_{prop}^{(m)})}{L^{(m)}(\theta; \mathbf{t}_{old}^{(m)})}, 1 \right),$$

120 where  $\mathbf{t}_{old}^{(m)}$  denotes the corresponding augmented data from the previous step  
 121 of the chain, and where the model parameters,  $\theta$ , remain unchanged in this  
 122 step (i.e., proposed times are accepted/rejected independently for each  
 123 household, according to the likelihood contribution from that household).

124 3. Propose new values for the infection time of one randomly chosen infected  
 125 host in each household (either symptomatic or asymptomatic), using  
 126 independent normal proposal distributions (around the equivalent times in the  
 127 previous step of the chain). For each household,  $m$ , accept the proposed  
 128 augmented data,  $\mathbf{t}_{prop}^{(m)}$ , from that household with probability

$$129 \quad \min \left( \frac{L^{(m)}(\theta; \mathbf{t}_{prop}^{(m)})}{L^{(m)}(\theta; \mathbf{t}_{old}^{(m)})}, 1 \right).$$

130 4. Propose new values for both the infection time,  $t$ , and the time of the start of  
 131 the  $I$  stage,  $t_s$ , holding  $t_s - t$  constant, for one randomly chosen asymptomatic  
 132 infected host in each household (in households where there was at least one),  
 133 using independent normal proposal distributions (around the equivalent times  
 134 in the previous step of the chain). For each household,  $m$ , accept the proposed  
 135 augmented data,  $\mathbf{t}_{prop}^{(m)}$ , from that household with probability

$$136 \quad \min \left( \frac{L^{(m)}(\theta; \mathbf{t}_{prop}^{(m)})}{L^{(m)}(\theta; \mathbf{t}_{old}^{(m)})}, 1 \right).$$

137

138 Relationship between generation time, TOST and serial interval

139 Here, we consider a randomly chosen infector-infectee pair (in which both the infector and  
140 the infectee develop symptoms) within a large, well-mixed population. In that setting, the  
141 observed distribution of generation times is equal to the normalised infectiousness profile,  
142 which will not be true within a household (cf. Figure 1 and Figure S4). We define:

143  $\tau_{inc,1}$  = (incubation period of the infector),

144  $\tau_{inc,2}$  = (incubation period of the infectee),

145  $\tau_{gen}$  = (generation time),

146  $x_{tost}$  = (time from onset of symptoms (of infector) to transmission (TOST)),

147  $x_{ser}$  = (serial interval),

148 where we use  $\tau$  for time intervals relative to the time of infection and  $x$  for those relative to  
149 the time of symptom onset. We denote the probability density functions of these time periods  
150 by  $f_{inc,1}$ ,  $f_{inc,2}$ ,  $f_{gen}$ ,  $f_{tost}$  and  $f_{ser}$ , respectively. Note that we have

151 
$$x_{tost} = \tau_{gen} - \tau_{inc,1},$$

152 and

153 
$$x_{ser} = x_{tost} + \tau_{inc,2},$$

154 so that

155 
$$x_{ser} = \tau_{gen} + \tau_{inc,2} - \tau_{inc,1}.$$

156

157 In the independent transmission and symptoms model,  $\tau_{gen}$  and  $\tau_{inc,1}$  are assumed to be  
158 independent, and the incubation periods of the infector and infectee are assumed to be drawn  
159 independently from the population incubation period distribution,  $f_{inc} = f_{inc,1} = f_{inc,2}$ .

160 Therefore, the TOST distribution is given by the convolution

161 
$$f_{tost}(x_{tost}) = \int_0^\infty f_{gen}(x_{tost} + \tau) f_{inc}(\tau) d\tau. \quad (1)$$

162 We also assume that  $x_{tost}$  and  $\tau_{inc,2}$  are independent, so the serial interval distribution can be  
 163 calculated from the TOST distribution as

$$164 \quad f_{ser}(x_{ser}) = \int_0^{\infty} f_{tost}(x_{ser} - \tau) f_{inc}(\tau) d\tau. \quad (2)$$

165 Note that

$$166 \quad E[x_{ser}] = E[\tau_{gen}] + E[\tau_{inc,2}] - E[\tau_{inc,1}] = E[\tau_{gen}],$$

167 i.e., the generation time and serial interval distributions have the same mean.

168

169 For the mechanistic model, we still have  $f_{inc,2} = f_{inc}$ , and the serial interval distribution can  
 170 be calculated from the TOST distribution using equation (2). On the other hand,  $\tau_{gen}$  and  
 171  $\tau_{inc,1}$  are not independent, so equation (1) connecting the TOST and generation time  
 172 distributions for the independent transmission and symptoms model does not hold for the  
 173 mechanistic model. As shown in [1], the TOST distribution for the mechanistic model is,  
 174 instead, given by

$$175 \quad f_{tost}(x_{tost}) = \begin{cases} \alpha_p C(1 - F_p(-x_{tost})), & x_{tost} < 0, \\ C(1 - F_I(x_{tost})), & x_{tost} \geq 0. \end{cases}$$

176

177 Further, under the mechanistic model, the expected number of presymptomatic transmissions  
 178 generated by an infected host is dependent on their incubation period. As a result, the  
 179 infector's incubation period does not follow the same distribution as that of the infectee. In  
 180 particular, by Bayes' theorem, we have

$$181 \quad f_{inc,1}(\tau_{inc,1}) = p(\tau_{inc,1} | 1 \rightarrow 2) = \frac{p(1 \rightarrow 2 | \tau_{inc,1}) f_{inc}(\tau_{inc,1})}{p(1 \rightarrow 2)},$$

182 where we write  $1 \rightarrow 2$  to denote the occurrence of the transmission from the infector to the  
 183 infectee. Because we are here considering a large population, the probability of the



184 transmission occurring is proportional to the overall infectiousness of the infector (integrated  
 185 over the course of infection),  $B(\infty)$ , so we have

$$186 \quad f_{inc,1}(\tau_{inc,1}) = \frac{B(\infty | \tau_{inc})f_{inc}(\tau_{inc,1})}{B(\infty)} = \left( \frac{\alpha_p k_p \gamma \mu \tau_{inc,1} + k_{inc} \gamma}{\alpha_p k_p \mu + k_{inc} \gamma} \right) f_{inc}(\tau_{inc,1}).$$

187 The expected incubation period of the infector is then

$$188 \quad E[\tau_{inc,1}] = \frac{1}{\gamma} + \frac{\alpha_p k_p \mu}{k_{inc} \gamma (\alpha_p k_p \mu + k_{inc} \gamma)} = E[\tau_{inc,2}] + \frac{q_p}{k_{inc} \gamma},$$

189 where  $q_p$  is the proportion of transmissions occurring prior to symptom onset.

190

191 As a result of the above, the expected values of the generation time and serial interval in the  
 192 mechanistic model are not equal. Instead, we have

$$193 \quad E[x_{ser}] = E[\tau_{gen}] - \frac{q_p}{k_{inc} \gamma}.$$

194 Under the values of  $k_{inc}$  and  $\gamma$  that we assumed (Table S1), this gives a mean generation time  
 195 that is approximately  $(1.6 \times q_p)$  days longer than the mean serial interval.

196

197 **Supplementary Figures:**

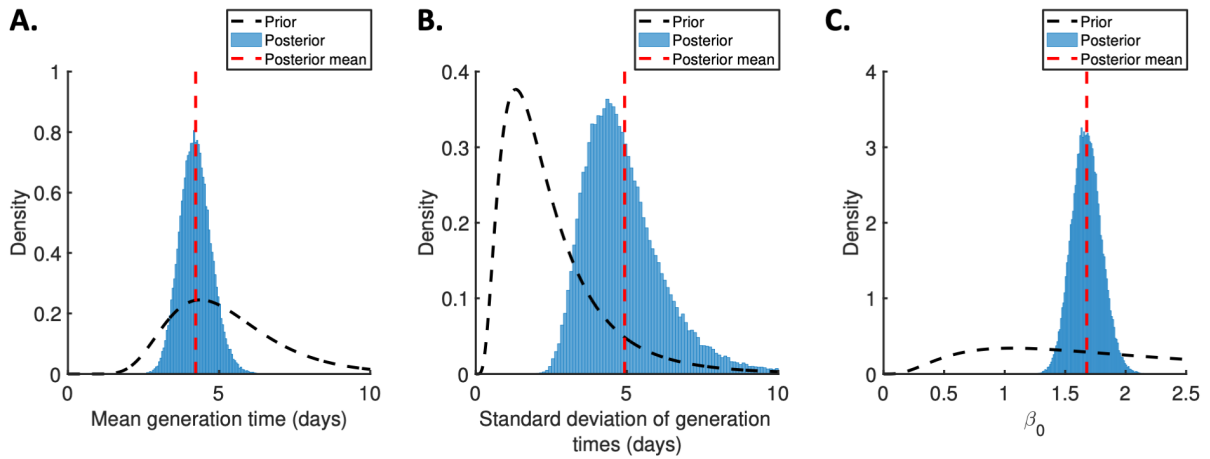

198

199 **Figure S1. Posterior distributions for the independent transmission and symptoms model. Prior**

200 distributions (black dotted lines), posterior distributions (blue bars), and posterior means (vertical red dotted

201 lines) for fitted parameters in the independent transmission and symptoms model. A. Mean generation time. B.

202 Standard deviation of generation times. C. Overall infectiousness,  $\beta_0$ .

203

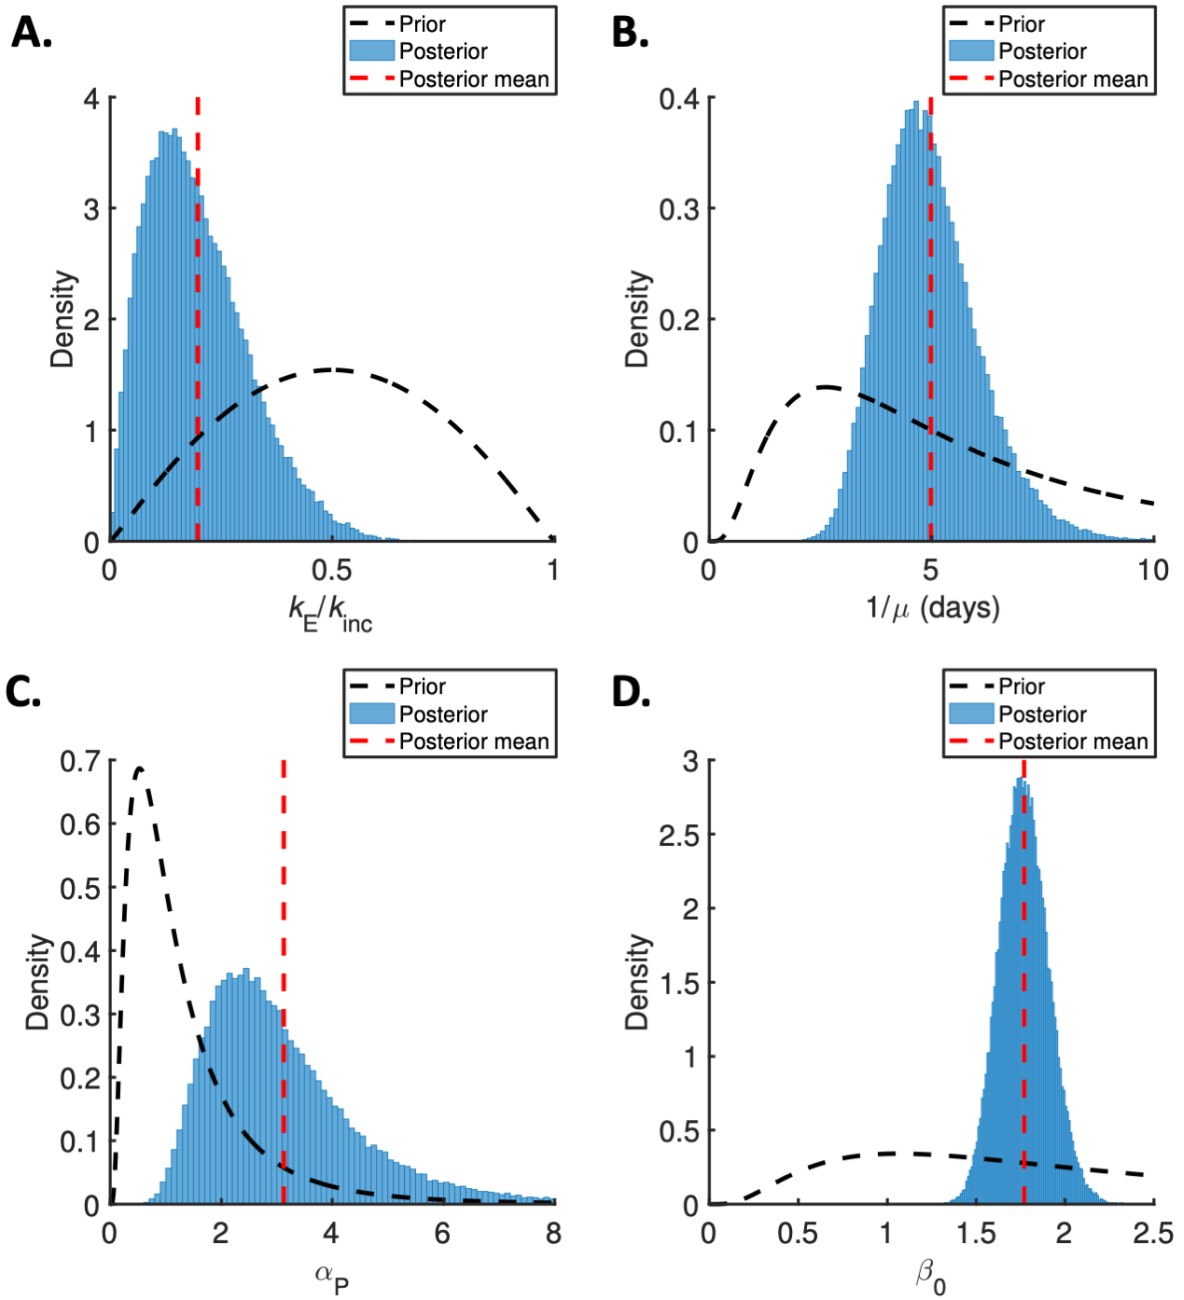

204

205 **Figure S2. Posterior distributions for the mechanistic model.** Prior distributions (black dotted lines),

206 posterior distributions (blue bars), and posterior means (vertical red dotted lines) for fitted parameters in the

207 mechanistic model. A. Ratio of mean durations of the latent (E) and incubation (E+P) periods,  $k_E/k_{inc}$ . B.

208 Mean symptomatic infectious (I) period,  $1/\mu$ . C. Ratio of transmission rates in the P and I stages,  $\alpha_P$ . D. Overall

209 infectiousness,  $\beta_0$ .

210

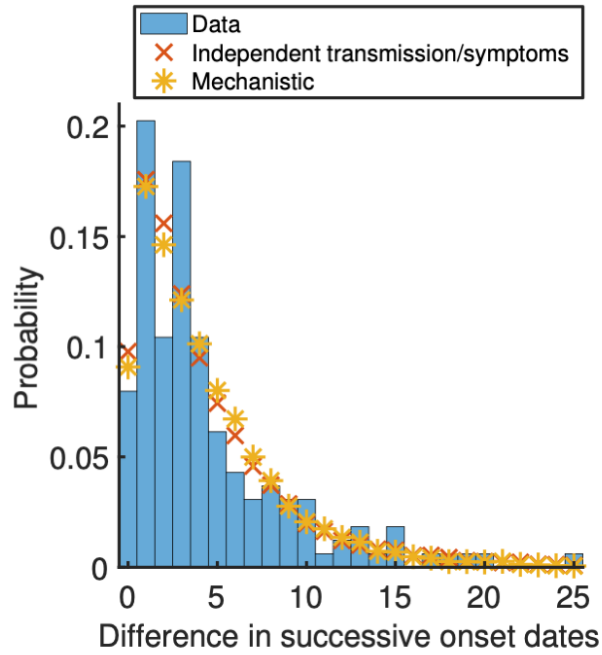

211

212 **Figure S3. Observed and model-predicted distributions of intervals between successive symptom onset**  
 213 **dates.** Using posterior mean parameter estimates, we predicted the distribution of the difference in successive  
 214 symptom onset dates (this differs from the serial interval because an infected individual may not have been  
 215 infected by the previous household member to develop symptoms) under the fitted independent transmission  
 216 and symptoms model (red crosses) and mechanistic model (yellow stars). These distributions were compared to  
 217 the UK household data (blue bars). The distributions for the fitted models were obtained by generating synthetic  
 218 data from 16,700 households using the same distribution of household sizes as in the UK data.

219

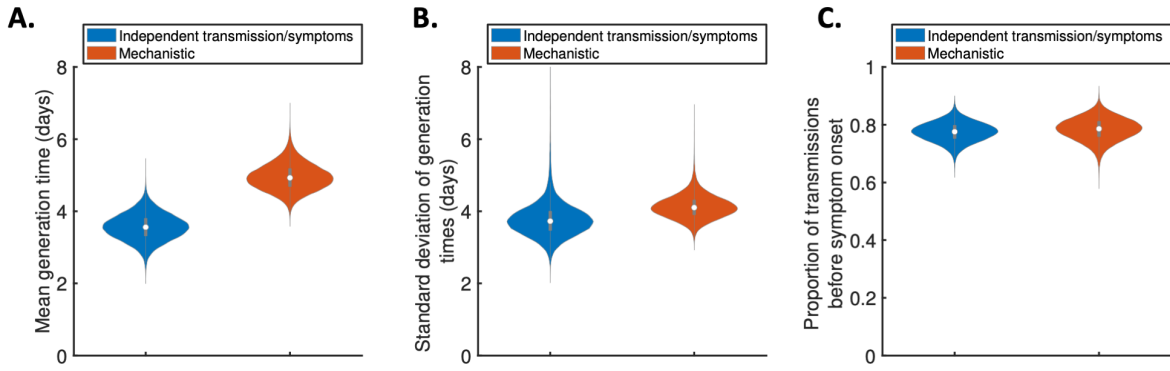

220

221

**Figure S4. Generation times within study households.** Violin plots indicating posterior distributions of the

222

mean (A) and standard deviation (B) of realised generation times in the study households, and the proportion of

223

transmissions occurring prior to symptom onset (C), for the independent transmission and symptoms model

224

(blue) and mechanistic model (red).

225

**A.**

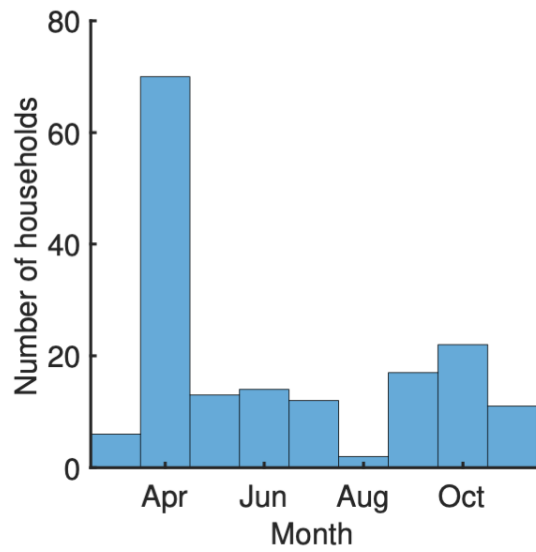

**B.**

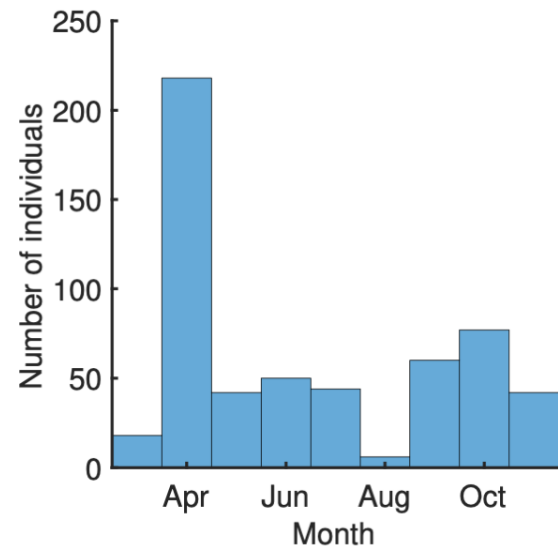

226

227 **Figure S5. Number of study households and household members by recruitment month.** A. Bars indicating

228 the number of households recruited each month into the study from which we obtained the household

229 transmission data used in our analyses, from March to November 2020. B. Equivalent panel showing the total

230 number of individuals within the households recruited each month.

231

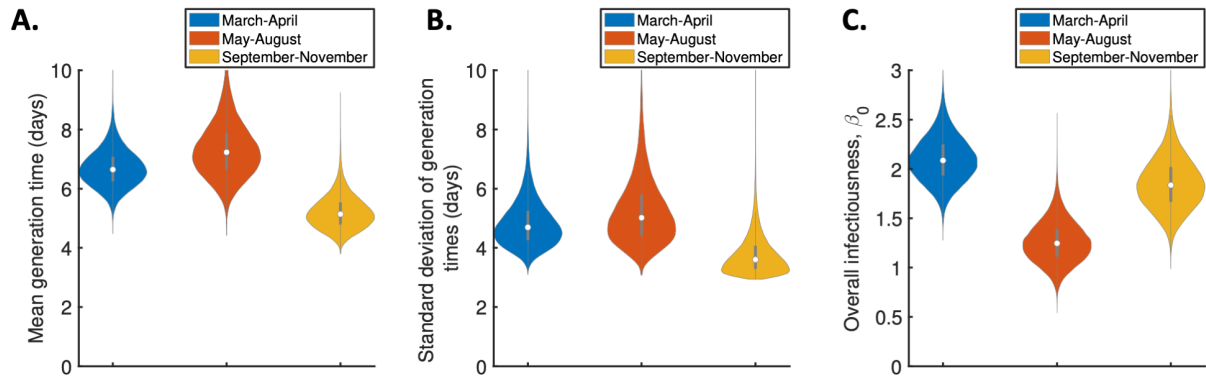

232

233

**Figure S6. Temporal changes in the generation time distribution for the mechanistic model.** Violin plots

234

indicating posterior distributions of the mean generation time (A), standard deviation of generation times (B),

235

and overall infectiousness parameter,  $\beta_0$  (C), for the mechanistic model fitted to data from March-April (blue),

236

May-August (red) or September-November 2020 (orange).

237

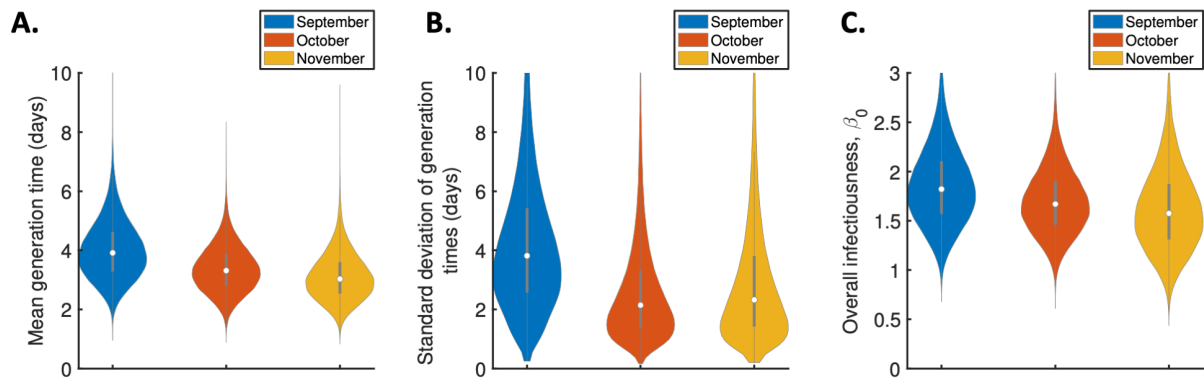

238

239

**Figure S7. Monthly changes in the generation time distribution from September-November 2020.** Violin

240

plots indicating posterior distributions of the mean generation time (A), standard deviation of generation times

241

(B), and overall infectiousness parameter,  $\beta_0$  (C), for the independent transmission and symptoms model fitted

242

to data from September (blue), October (red) or November 2020 (orange).

243



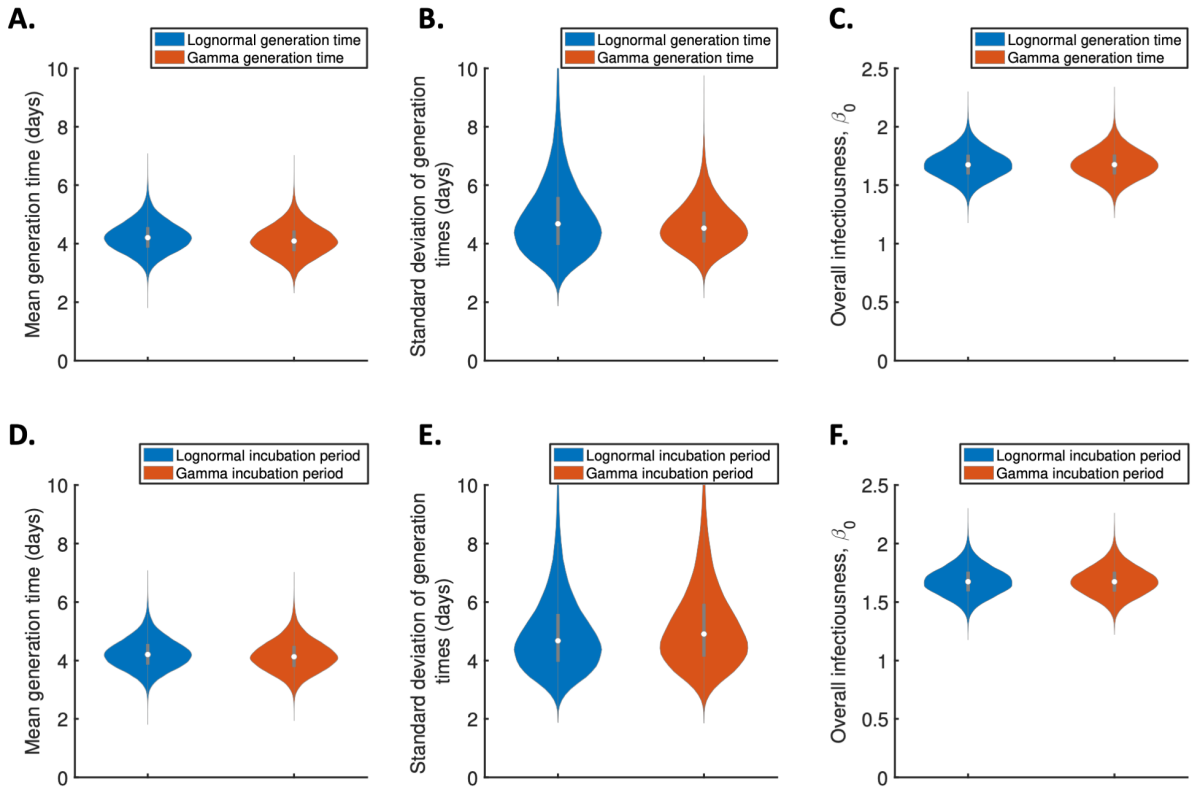

244

245

**Figure S8. Sensitivity of results to the functional forms of the generation time and incubation period**

246

**distributions for the independent transmission and symptoms model.** A-C. Violin plots indicating posterior

247

distributions of the mean generation time (A), standard deviation of generation times (B), and overall

248

infectiousness parameter,  $\beta_0$  (C), for the independent transmission and symptoms model, when the generation

249

time was assumed to follow either a lognormal (blue, as in the main text) or a gamma (red) distribution, and the

250

incubation period distribution followed a lognormal distribution (as in the main text). D-F. Equivalent panels to

251

A-C, instead comparing cases where the incubation period was assumed to follow either a lognormal

252

distribution (blue, as in the main text) or a gamma distribution with the same mean and standard deviation (red),

253

and the generation time followed a lognormal distribution (as in the main text).

254

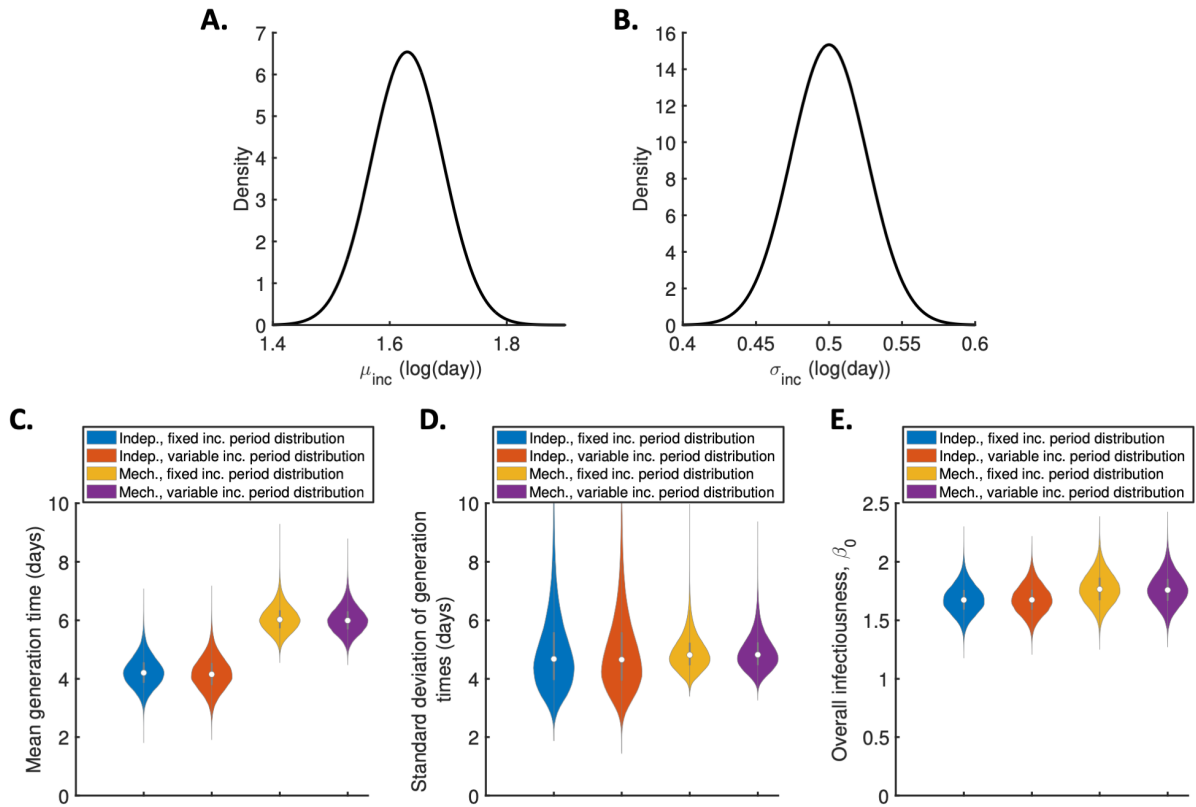

255

256 **Figure S9. Sensitivity of the results to the incubation period distribution.** A-B. Uncertainty in the incubation

257 period distribution was accounted for by updating the parameters,  $\mu_{inc}$  and  $\sigma_{inc}$ , of a lognormal incubation

258 period distribution (these parameters represent the mean and standard deviation of the natural logarithm of the

259 incubation period distribution, respectively) alongside unknown model parameters in the MCMC procedure.

260 Independent normal prior distributions (truncated at zero) consistent with the 95% confidence intervals obtained

261 in [2] were assumed for  $\mu_{inc}$  (prior mean 1.63 log(day), standard deviation 0.061, 95% CrI 1.51-1.75; panel A)

262 and  $\sigma_{inc}$  (prior mean 0.5 log(day), standard deviation 0.026, 95% CrI 0.45-0.55; panel B). This incubation

263 period was used directly when evaluating the likelihood in the independent transmission and symptoms model.

264 In the mechanistic model, we assumed a gamma distributed incubation period with the same mean and standard

265 deviation as a lognormal distribution with parameters  $\mu_{inc}$  and  $\sigma_{inc}$ . C-E. Violin plots indicating posterior

266 distributions of the mean generation time (C), standard deviation of generation times (D), and overall

267 infectiousness parameter,  $\beta_0$  (E), for the independent transmission and symptoms model with either a fixed (as

268 in the main text; blue) or variable (i.e., accounting for uncertainty in  $\mu_{inc}$  and  $\sigma_{inc}$  as described above; red)

269 incubation period distribution, and for the mechanistic model with a fixed (orange) or variable (purple)

270 incubation period distribution.

271

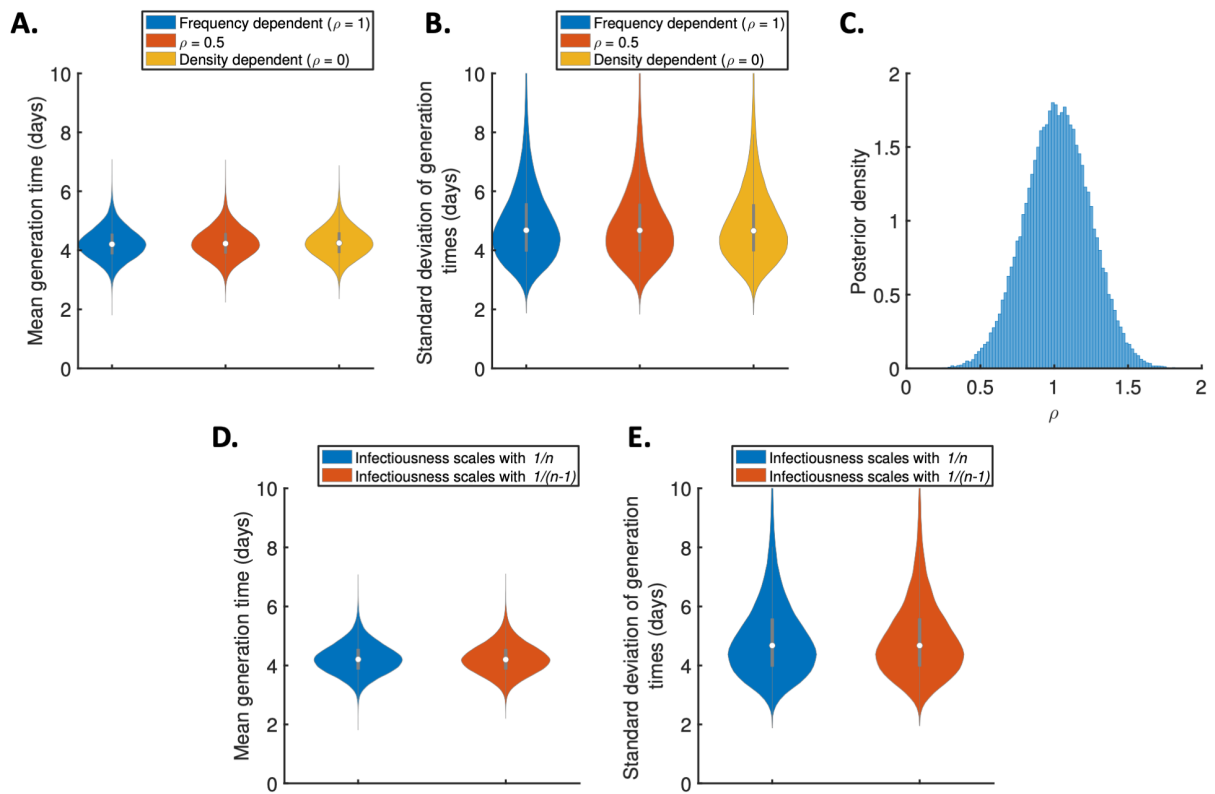

272

273 **Figure S10. Sensitivity of the results to the dependency of transmission on the household size.** A-B. Violin

274 plots indicating the posterior distributions of the mean generation time (A) and standard deviation of generation

275 times (B), for the independent transmission and symptoms model under different assumptions about the

276 dependency of transmission on the household size. In these panels, infectiousness is assumed to scale with  $n^{-\rho}$ ,

277 where  $n$  is the household size, for  $\rho = 1$  (frequency-dependent transmission, blue),  $\rho = 0.5$  (red),  $\rho = 0$

278 (density-dependent transmission, orange). C. Posterior distribution of the dependency,  $\rho$ , when it was fitted to

279 the data (alongside other model parameters), assuming a uniform prior for  $\rho$ . D-E. Equivalent panels to A-B,

280 when infectiousness was instead assumed to scale with either  $1/n$  (blue) or  $1/(n-1)$  (red).

281

282

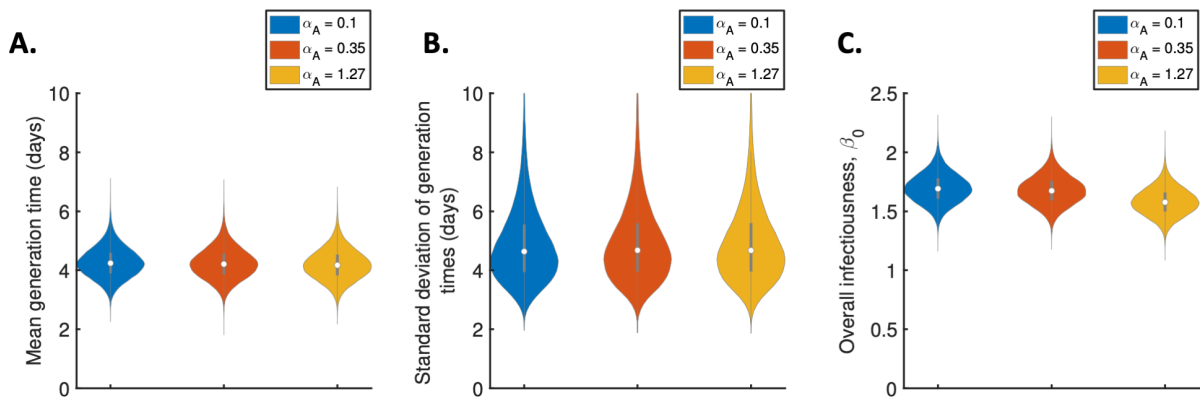

283

284 **Figure S11. Sensitivity of the results to the relative infectiousness of entirely asymptomatic infected hosts.**

285 Violin plots indicating posterior distributions of the mean generation time (A), standard deviation of generation

286 times (B), and overall infectiousness parameter,  $\beta_0$  (C), for the independent transmission and symptoms model,

287 when the relative infectiousness of asymptomatic hosts (compared to a host who develops symptoms, at the

288 same time since infection) was  $\alpha_A = 0.1$  (blue),  $\alpha_A = 0.35$  (red) and  $\alpha_A = 1.27$  (orange).

289

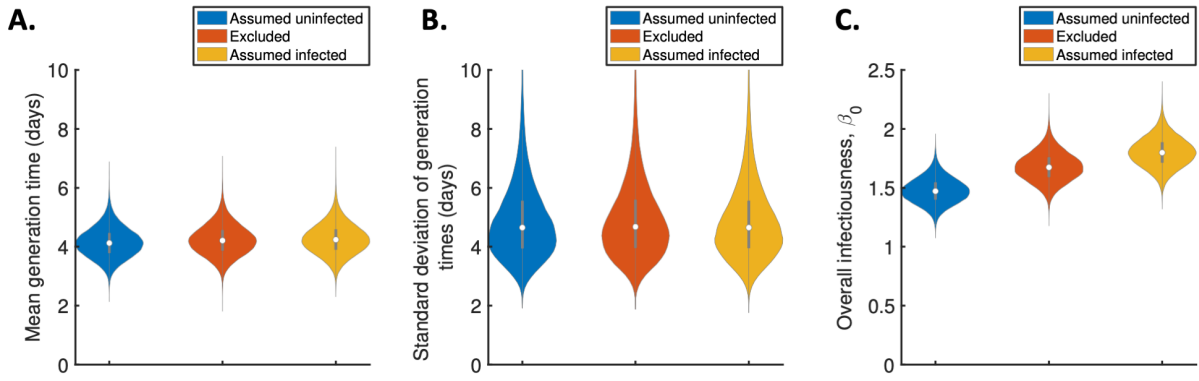

290

291

**Figure S12. Sensitivity of the results to the exclusion of hosts with unknown infection status.** A-C. Violin

292

plots indicating the posterior distributions of the mean generation time (A), standard deviation of generation

293

times (B), and overall infectiousness parameter,  $\beta_0$  (C), for the independent transmission and symptoms model,

294

when hosts with unknown infection status were assumed all uninfected (blue), excluded (red), or assumed all

295

infected (orange).

296

297 **Supplementary Tables:**

| <b>Parameter</b>                                                 | <b>Model</b>                          | <b>Interpretation</b>                                                 | <b>Value</b>  | <b>Justification</b>                                                          |
|------------------------------------------------------------------|---------------------------------------|-----------------------------------------------------------------------|---------------|-------------------------------------------------------------------------------|
| $\alpha_A$                                                       | Both                                  | Relative infectiousness of entirely asymptomatic hosts                | 0.35          | Taken from [3] (other values considered in sensitivity analyses)              |
| Mean of natural logarithm of the incubation period               | Independent transmission and symptoms | Parameter of lognormal incubation period distribution                 | 1.63 log(day) | Taken from [2] (uncertainty in this value considered in sensitivity analyses) |
| Standard deviation of natural logarithm of the incubation period | Independent transmission and symptoms | Parameter of lognormal incubation period distribution                 | 0.50 log(day) | Taken from [2] (uncertainty in this value considered in sensitivity analyses) |
| $k_{inc}$                                                        | Mechanistic                           | Shape parameter of gamma incubation period distribution               | 3.5           | Consistent with mean and standard deviation in [2]                            |
| $1/\gamma$                                                       | Mechanistic                           | Mean incubation period                                                | 5.8 days      | Consistent with mean and standard deviation in [2]                            |
| $k_I$                                                            | Mechanistic                           | Shape parameter of (gamma) symptomatic infectious period distribution | 1             | Assumed                                                                       |

298

299 **Table S1.** Assumed (not fitted) parameter values used for the two models that we considered.

| <b>Parameter</b>                            | <b>Prior</b>                                                        | <b>Posterior mean (95% CrI)</b> |
|---------------------------------------------|---------------------------------------------------------------------|---------------------------------|
| Mean generation time                        | Lognormal(1.6,0.35)<br>[prior median 5.0 days, 95% CI 2.5-9.8 days] | 4.2 days<br>(3.3-5.3 days)      |
| Standard deviation of generation times      | Lognormal(0.7,0.65)<br>[prior median 2.0 days, 95% CI 0.6-7.2 days] | 4.9 days<br>(3.0-8.3 days)      |
| Overall infectiousness parameter, $\beta_0$ | Lognormal(0.7,0.8)<br>[prior median 2.0, 95% CI 0.4-9.7]            | 1.7<br>(1.4-1.9)                |

300

301 **Table S2.** Fitted parameters in the independent transmission and symptoms model, the prior distributions used,

302 and the posterior means and 95% credible intervals obtained.

303

| <b>Parameter</b>                                                                                        | <b>Prior</b>                                                        | <b>Posterior mean (95% CrI)</b> |
|---------------------------------------------------------------------------------------------------------|---------------------------------------------------------------------|---------------------------------|
| Ratio of mean durations of the latent ( <i>E</i> ) and incubation ( <i>E+P</i> ) periods, $k_E/k_{inc}$ | Beta(2.1,2.1)<br>[prior median 0.5, 95% CI 0.1-0.9]                 | 0.2<br>(0.03-0.5)               |
| Mean symptomatic infectious ( <i>I</i> ) period, $1/\mu$                                                | Lognormal(1.6,0.8)<br>[prior median 5.0 days, 95% CI 1.0-23.8 days] | 5.0 days<br>(3.2-7.5 days)      |
| Ratio of transmission rates in the <i>P</i> and <i>I</i> stages, $\alpha_P$                             | Lognormal(0,0.8)<br>[prior median 1.0, 95% CI 0.2-4.8]              | 3.1<br>(1.2-6.9)                |
| Overall infectiousness parameter, $\beta_0$                                                             | Lognormal(0.7,0.8)<br>[prior median 2.0, 95% CI 0.4-9.7]            | 1.8<br>(1.5-2.1)                |

304

305 **Table S3.** Fitted parameters in the mechanistic model, the prior distributions used, and the posterior means and

306 95% credible intervals obtained.

307



308 **References:**

- 309 [1] Hart WS, Maini PK, Thompson RN. High infectiousness immediately before COVID-  
310 19 symptom onset highlights the importance of continued contact tracing. *eLife* 2021;  
311 10: e65534.
- 312 [2] McAloon C, Collins Á, Hunt K, et al. Incubation period of COVID-19: a rapid  
313 systematic review and meta-analysis of observational research. *BMJ Open* 2020; 10:  
314 e039652.
- 315 [3] Buitrago-Garcia D, Egli-Gany D, Counotte MJ, et al. Occurrence and transmission  
316 potential of asymptomatic and presymptomatic SARS-CoV-2 infections: A living  
317 systematic review and meta-analysis. *PLOS Med* 2020; 17: e1003346.

318
